# Supplementary material for: Cyanosol-enabled ultrafine alloy nanocrystals on graphene as a hybridization matrix for long-life and high-rate silicon anodes
Source: Royal Society of Chemistry journal article supplement (doi:10.1039/d4nj01660b), 2024-01-01
Supplement: d4nj01660b1.pdf [file d4nj01660b1.pdf]

## Supplementary Information

# Cyanosol-Enabled Ultrafine Alloy Nanocrystals on Graphene as Hybridization Matrix for Long-Life and High-Rate Silicon Anodes

Junwen Zhu<sup>a,§</sup>, Xiaoyun Li<sup>a,§</sup>, Jingyi Chen<sup>a</sup>, Cen Wang,<sup>b</sup> Zhe Li,<sup>b</sup> Xin Cao<sup>a,\*</sup>, Yiming Zhou<sup>a</sup>, Yawen Tang<sup>a</sup> and

Ping Wu<sup>a,\*</sup>

<sup>a</sup>Jiangsu Key Laboratory of New Power Batteries, Jiangsu Collaborative Innovation Center of Biomedical Functional Materials, School of Chemistry and Materials Science, Nanjing Normal University, Nanjing 210023, PR China.

<sup>b</sup>Berzelius (Nanjing) Co., Ltd., Nanjing, 210012, PR China.

§ J. Zhu and X. Li contributed equally to this work.

E-mail: [zjuwuping@njnu.edu.cn](mailto:zjuwuping@njnu.edu.cn) (P. Wu), [xincao@njnu.edu.cn](mailto:xincao@njnu.edu.cn) (X. Cao).

## EXPERIMENTAL SECTION

**Synthesis of the Si/FeCo/G nanohybrid.** In a typical synthesis, solutions of 0.01 M FeCl<sub>3</sub> and 0.01 M K<sub>3</sub>Co(CN)<sub>6</sub> were mixed in equal volumes and dialyzed to form Fe-Co cyanosol. Next, 5 mg of GO powder (DX-GO-33, Shenzhen DX Time Technology Co., Ltd.), with a lateral size of 1-20 μm, was dispersed in 20 mL of deionized (DI) water by ultrasonication. Then, 80 mg polyvinylpyrrolidone (PVP) was added, and the as-prepared PVP-encapsulated GO solution (4.2 mL) was mixed with 16.8 mL of KCl (0.625 M), which was followed by the addition of 0.1 mL of poly (diallyldimethylammonium chloride) (PDDA) (20 wt%) solution. After ultrasonication and washing with DI water, the mixture was dispersed in an additional 4 mL of DI water to form a positively charged GO suspension. Then, 5 mL of Fe-Co cyanosol was added to 15 mL of the positively charged GO solution, and the mixture was ultrasonicated for 2 h. Next, 30 mg of silicon powder (average size of ~50 nm, Alfa Aesar) was added to the mixture to form Si/Fe-Co/GO nanohybrid. The obtained Si/Fe-Co/GO nanohybrid was pyrolyzed at 500 °C for 3 h under N<sub>2</sub> flow to obtain Si/FeCo/G nanohybrid. For comparison, Si/G nanohybrid has also been prepared by pyrolyzing Si/GO nanohybrid instead of Si/Fe-Co/GO nanohybrid by keeping the other conditions unchanged.

**Characterization.** Scanning electron microscope (SEM, JSM-5610LV), transmission electron microscope (TEM, Hitachi H-7650), and high-resolution TEM (HRTEM, JEOL JEM-2100F, 200 kV) equipped with an energy-dispersive X-ray spectrometer (EDS, Thermo Fisher Scientific) were employed to characterize the morphologies and microstructures of the samples. The crystalline phases and crystallinity were identified by X-ray Powder Diffraction (XRD, Rigaku D/max 2500/PC). Fourier transform infrared (FTIR) spectra was conducted on a Bruker Tensor 27 spectrometer. Nitrogen adsorption/desorption tests were performed using a Micromeritics ASAP 2460 analyzer, employing both Brunauer-Emmett-Teller (BET) and Barrett-Joyner-Halenda (BJH)

methods for measuring surface area, pore volume and size. Thermogravimetric analysis (TGA) was performed using a thermal analyzer (NETZSCH STA) at a heating rate of  $10\text{ }^{\circ}\text{C min}^{-1}$  under an air atmosphere.

**Electrochemical Measurements.** The working electrodes were prepared using a slurry method, where the synthesized materials were combined with sodium carboxymethyl-cellulose (CMC) and carbon black in a weight ratio of 7:1.5:1.5 in deionized water. This mixture was then spread over copper foil current collectors and dried under vacuum at  $90\text{ }^{\circ}\text{C}$  for 12 hours. The lithium storage performance of the products was tested using CR-2025 coin cells which were assembled in an Ar-filled glove box (Innovative Technology, IL-2 GB) using lithium metal foil as the counter electrode. The electrolyte consisted of 1 M  $\text{LiPF}_6$  in ethylene carbonate (EC)/dimethyl carbonate (DMC) (1:1 in volume), containing 5 vol% fluoroethylene carbonate (FEC). Galvanostatic discharge/charge measurements were performed using a LANHE battery test system (CT2001A) across a 0.01-1.2 V voltage window, starting at  $0.1\text{ A g}^{-1}$  for the first cycle and increasing to  $0.5\text{-}10\text{ A g}^{-1}$  in subsequent cycles. Cyclic voltammetry (CV) tests ( $0.1\text{-}1\text{ mV s}^{-1}$ ) and electrochemical impedance (EIS, from 100 kHz to 10 mHz) were performed using a CHI 660E electrochemical station. The  $\text{LiCoO}_2$  cathode and the Si/FeCo/G anode were used to assemble a full coin cell using the same electrolyte and separator for half cells. The specific capacity ratio of anode and cathode was  $\approx 1.2:1$ .

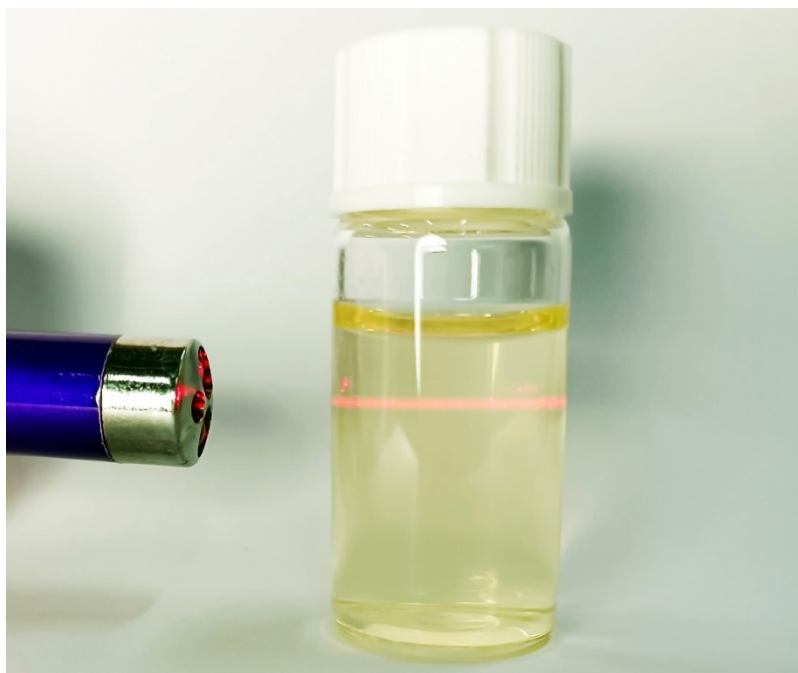

**Fig. S1** Photograph of the Fe-Co cyanosol and its Tyndall effect.

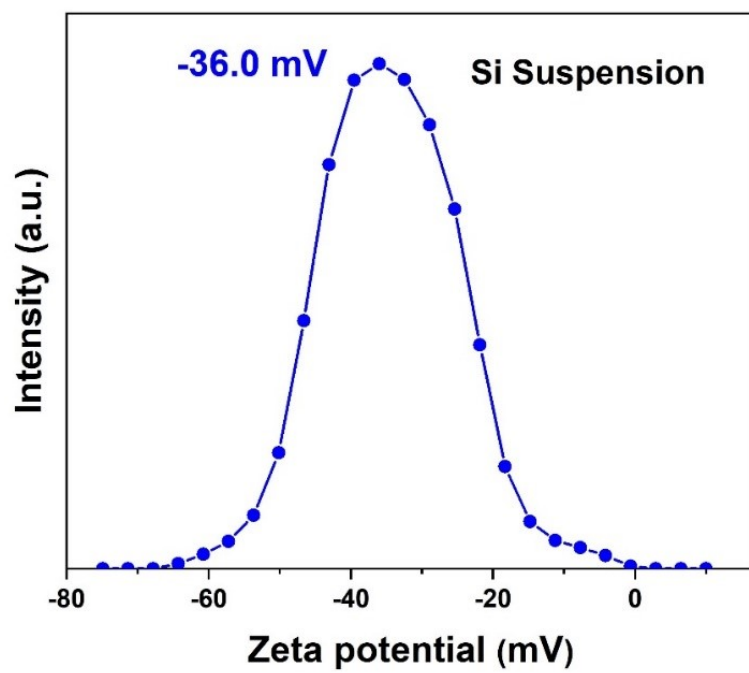

**Fig. S2** The zeta potential of the Si suspension.

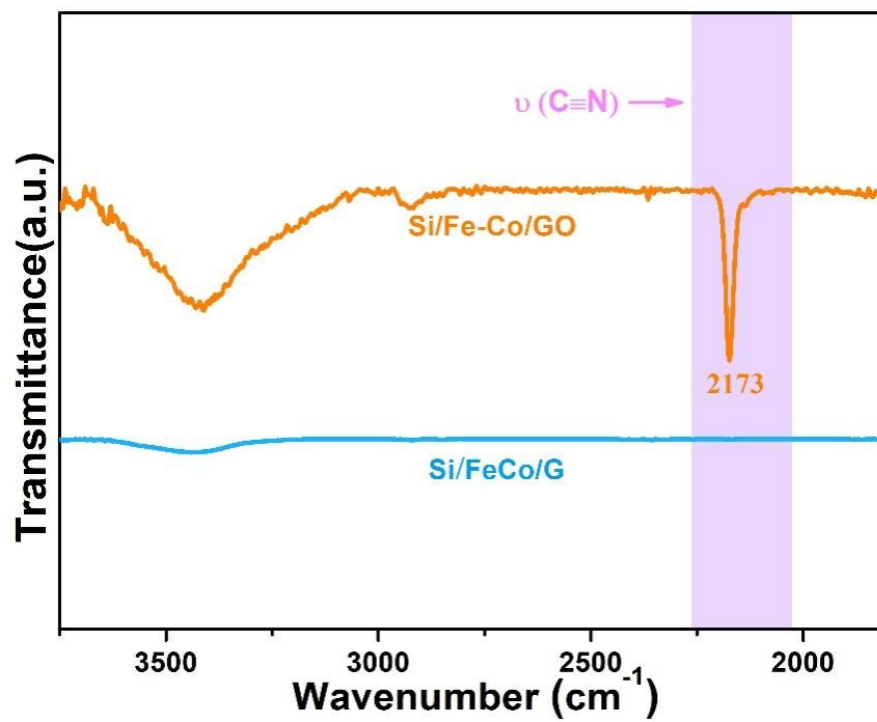

**Fig. S3** FTIR spectra of Si/FeCo/G nanohybrid compared with Si/Fe-Co/GO nanohybrid.

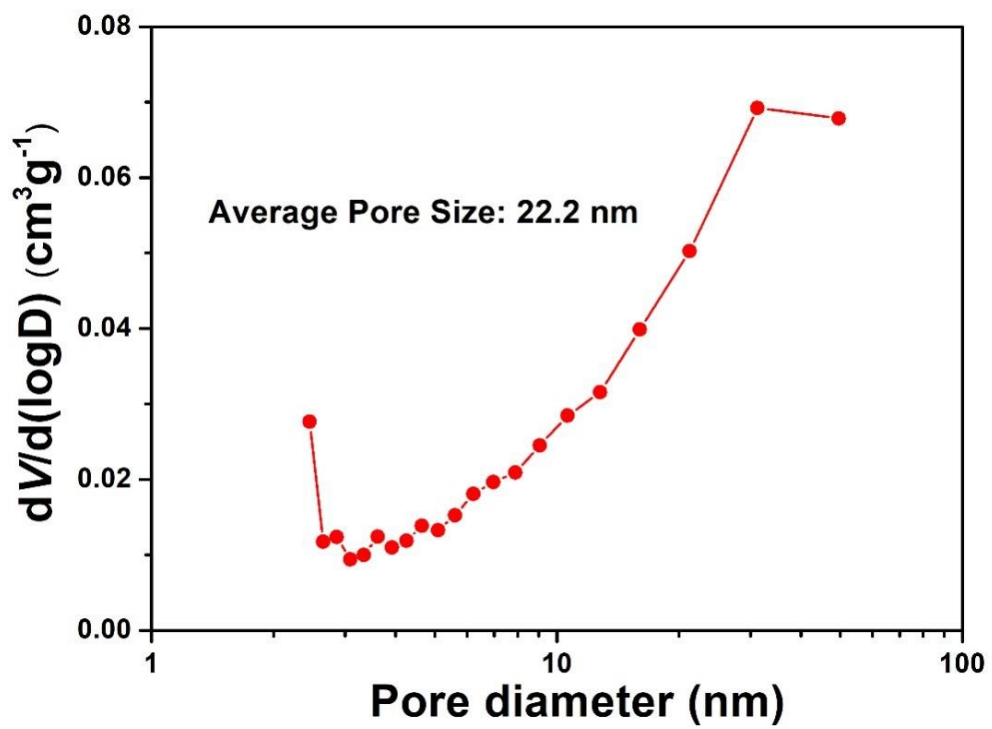

**Fig. S4** Pore size distribution of the Si/FeCo/G nanohybrid.

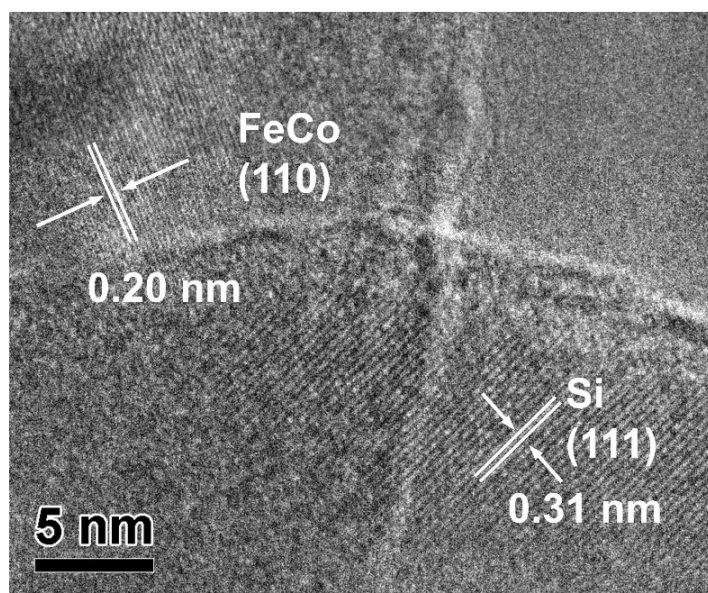

**Fig. S5** HRTEM image of the Si/FeCo/G nanohybrid with lattice fringes of Si and FeCo components.



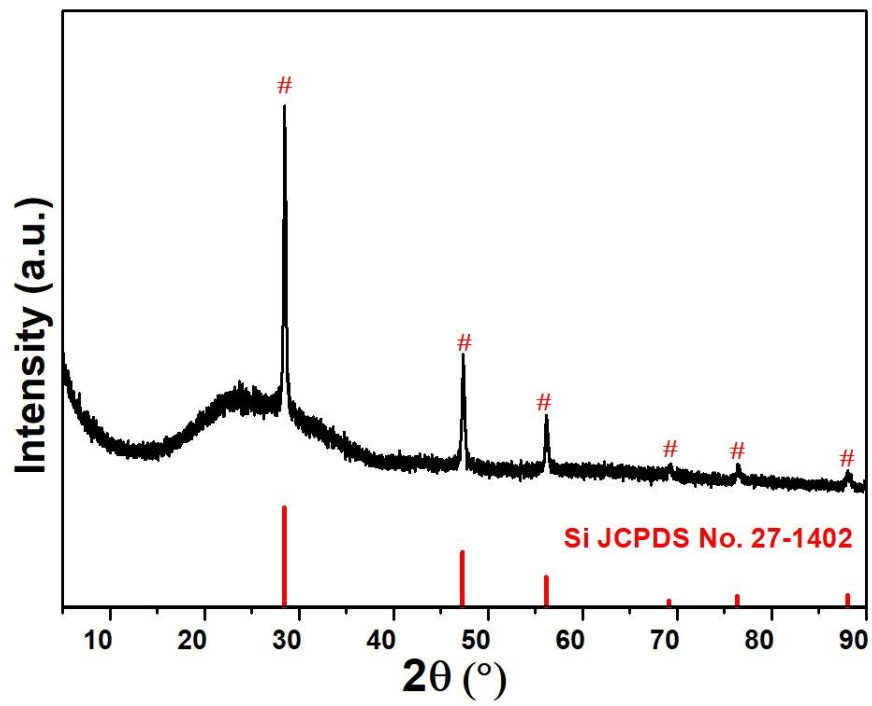

**Fig. S6** XRD pattern of Si/G nanohybrid.

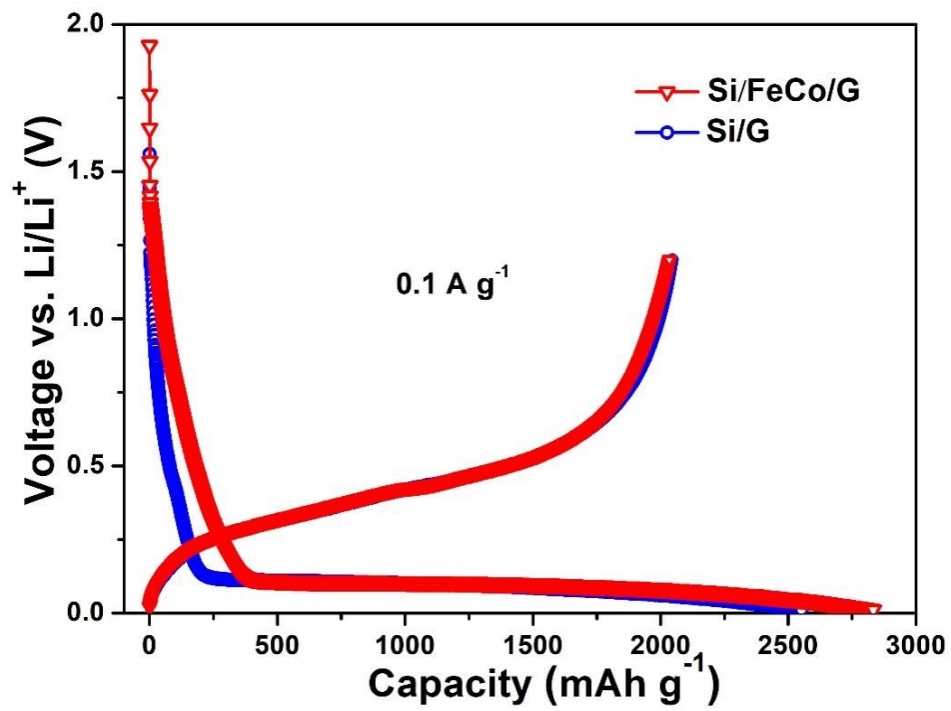

**Fig. S7** Initial discharge and charge curves of Si/FeCo/G anode compared with Si/G anode.

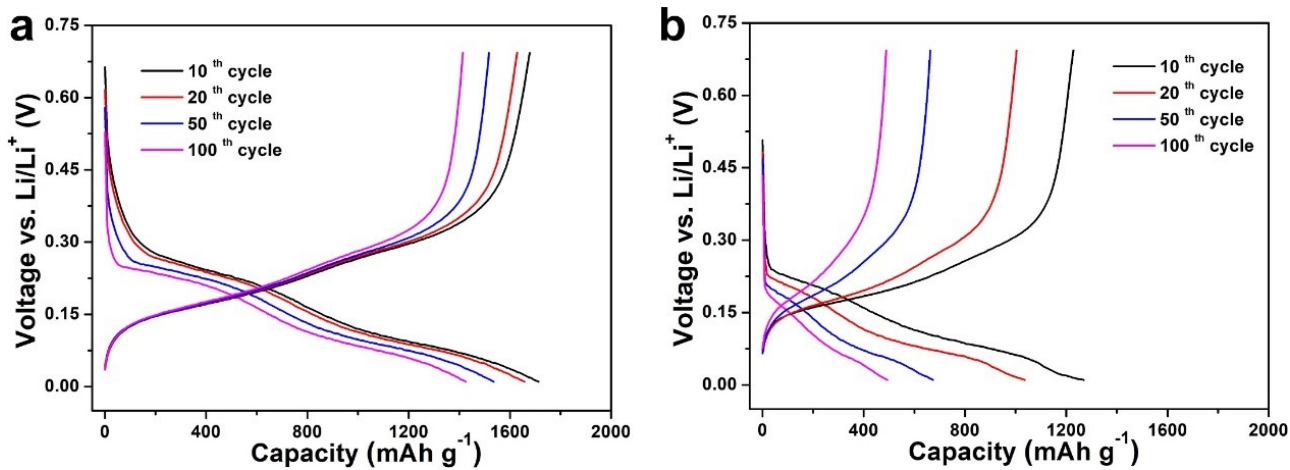

**Fig. S8** Discharge and charge curves in 10<sup>th</sup>, 20<sup>th</sup>, 50<sup>th</sup>, 100<sup>th</sup> cycles of (a) Si/FeCo/G anode and (b) Si/G anode.

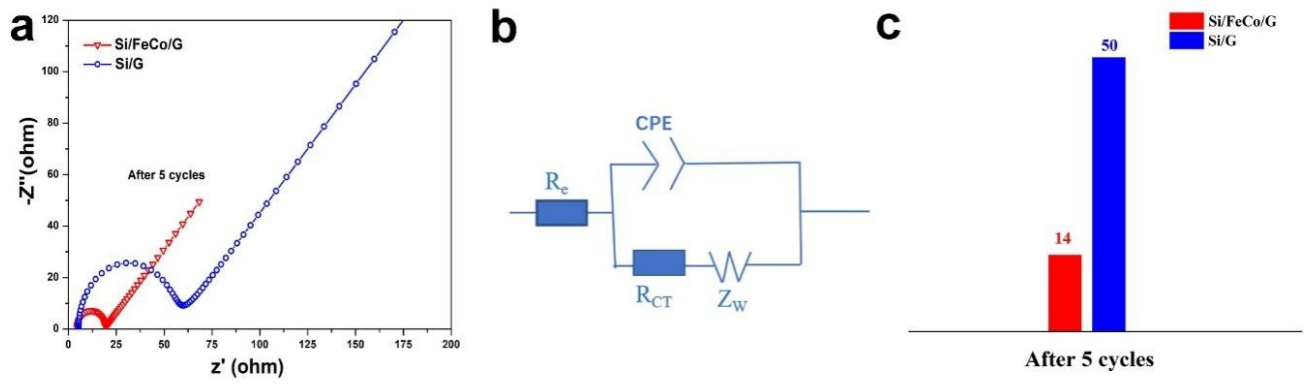

**Fig. S9** (a) Nyquist plots from impedance tests of the Si/FeCo/G and Si/G anodes. (b) The equivalent circuit model for the fitting of impedance plots. (c) The calculated  $R_{ct}$  of Si/FeCo/G anode compared with Si/G anode.

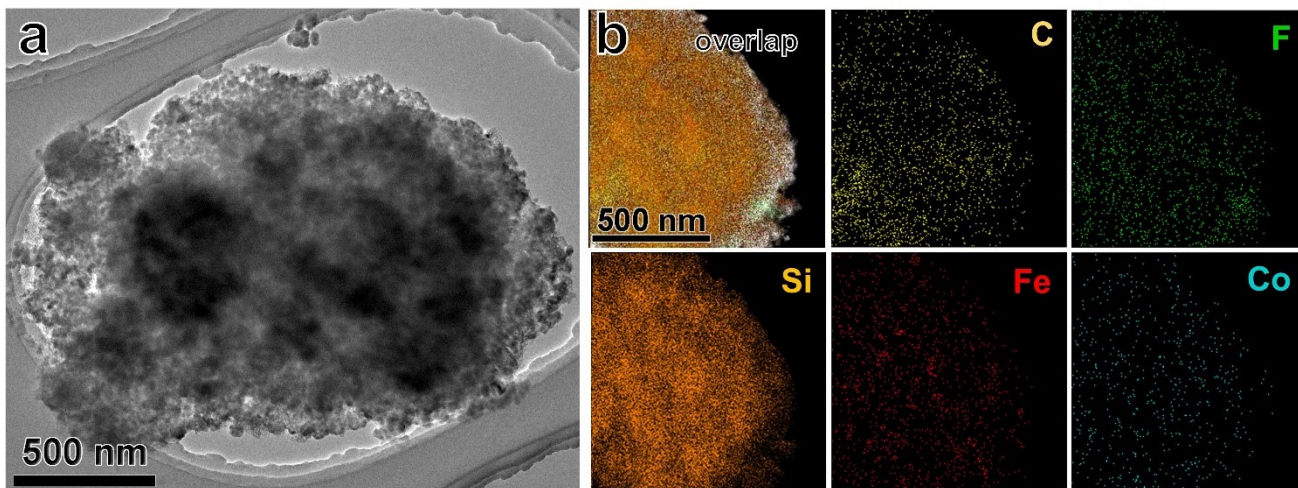

**Fig. S10** (a) TEM image and (b) EDS elemental mappings of Si/FeCo/G anode in a fully delithiated state (1.2 V vs  $\text{Li}^+/\text{Li}$ ) after cycling.

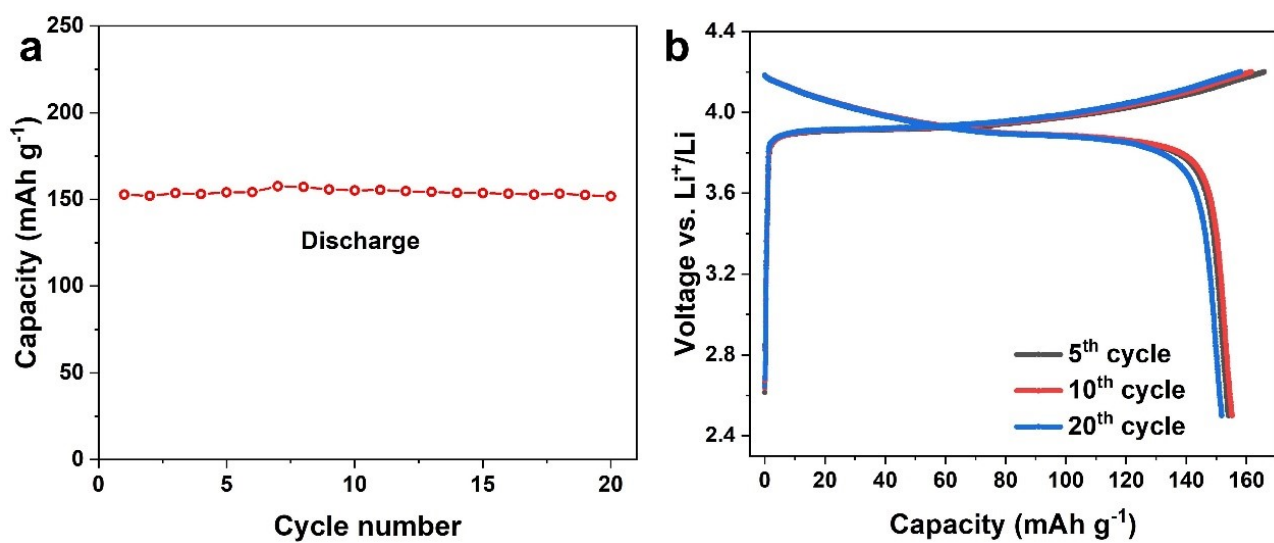

**Fig. S11** (a) Cycling performance and (b) discharge and charge curves in 5<sup>th</sup> , 10<sup>th</sup> , 20<sup>th</sup> cycles of LiCoO<sub>2</sub> in half cells.

**Table S1** Comparison of the lithium storage performance between the Si/FeCo/G anode and previous Si-M-C ternary anodes.

| Anode materials                                              | Cycling stability (mAh g <sup>-1</sup> )         | Rate capability (mAh g <sup>-1</sup> )                              | Ref              |
|--------------------------------------------------------------|--------------------------------------------------|---------------------------------------------------------------------|------------------|
| <b>Si/FeCo/G nanohybrid</b>                                  | <b>1426 at 0.5 A g<sup>-1</sup> (100 cycles)</b> | <b>1806 at 0.5 A g<sup>-1</sup><br/>1118 at 10 A g<sup>-1</sup></b> | <b>This work</b> |
| FeSi <sub>2</sub> /Si@C composite                            | 1085 at 0.1 A g <sup>-1</sup> (100 cycles)       | 1010 at 0.1 A g <sup>-1</sup><br>~710 at 1 A g <sup>-1</sup>        | 1                |
| Si-Cu-C/RGO/CNT composite                                    | ~1260 at 2 A g <sup>-1</sup> (100 cycles)        | 1866.7 at 0.5 A g <sup>-1</sup><br>821.4 at 10 A g <sup>-1</sup>    | 2                |
| Si/FeCo@G framework                                          | 974 at 0.5 A g <sup>-1</sup> (100 cycles)        | 1523 at 0.5 A g <sup>-1</sup><br>417 at 10 A g <sup>-1</sup>        | 3                |
| Si-Sn-DHCNF                                                  | ~ 569 at 0.1 A g <sup>-1</sup> (100 cycles)      | ~858.3 at 0.5 A g <sup>-1</sup><br>~ 746.3 at 10 A g <sup>-1</sup>  | 4                |
| Si-Sn@G gel framework                                        | 983 at 0.5 A g <sup>-1</sup> (100 cycles)        | 1222 at 0.5 A g <sup>-1</sup><br>514 at 10 A g <sup>-1</sup>        | 5                |
| Si/Ag/C nanohybrids                                          | 699 at 0.2 A g <sup>-1</sup> (100 cycles)        | 988 at 0.5 A g <sup>-1</sup><br>299 at 5 A g <sup>-1</sup>          | 6                |
| Si-SiC/G framework                                           | 1060 at 0.5 A g <sup>-1</sup> (100 cycles)       | 1151 at 0.5 A g <sup>-1</sup><br>441 at 10 A g <sup>-1</sup>        | 7                |
| Si <sub>20</sub> Co <sub>10</sub> C <sub>70</sub> composites | 610 at 0.05 A g <sup>-1</sup> (50 cycles)        | NA                                                                  | 8                |
| nanoporous Si-Co-C                                           | 1837 at 0.5 A g <sup>-1</sup> (100 cycles)       | 2237 at 0.5 A g <sup>-1</sup><br>1318 at 10 A g <sup>-1</sup>       | 9                |
| Si-FeSi <sub>2</sub> -G-C composite                          | ~918 at 0.2 A g <sup>-1</sup> (80 cycles)        | ~700 at 1.2 A g <sup>-1</sup><br>~550 at 2 A g <sup>-1</sup>        | 10               |
| Si/Cu/C composite                                            | 1560 at 0.5 A g <sup>-1</sup> (80 cycles)        | 1743 at 0.5 A g <sup>-1</sup><br>577 at 10 A g <sup>-1</sup>        | 11               |

## References

- [1] Y. Chen, J. Qian, Y. Cao, H. Yang, X. Ai, *ACS Appl. Mater. Interfaces*, 4 (2012) 3753-3758.
- [2] Y. Jiang, F. Xiang, S. Fan, Z. Sun, *New J. Chem.*, 45 (2021) 21591-21598.
- [3] X. Li, C. Xu, T. Xia, C. Wang, Z. Li, Y. Zhou, *J. Alloys Compd.*, 927 (2022) 167085.
- [4] B. Lee, H. Yang, K. Lee, S. Han, W. Yu, *Energy Storage Mater.*, 17 (2019) 62-69.
- [5] C. Xu, T. Xia, C. Wang, Z. Li, X. Li, Y. Zhou, *J. Power Sources*, 530 (2022) 231290.
- [6] S. Yin, D. Zhao, Q. Ji, Y. Xia, S. Xia, X. Wang, M. Wang, J. Ban, Y. Zhang, E. Metwalli, X. Wang, Y. Xiao, X. Zuo, S. Xie, K. Fang, S. Liang, L. Zheng, B. Qiu, Z. Yang, Y. Lin, L. Chen, C. Wang, Z. Liu, J. Zhu, P. Muller-Buschbaum, *ACS Nano*, 12 (2018) 861-875.
- [7] C. Xu, T. Xia, X. Li, A. Zhang, Y. Chen, C. Wang, R. Lin, Z. Li, P. Dai, Y. Zhou, P. Wu, Y. Tang, *Surf. Coating Technol.* 420 (2021) 127336.
- [8] J. Zhang, Y. Liang, Q. Zhou, Y. Peng, H. Yang, *J. Power Sources*, 290 (2015) 71-79.
- [9] Z. Zhan, T. Huang, J. Zhu, X. Cao, Y. Zhou, Y. Tang, P. Wu, *CrystEngComm*, 26 (2024) 639-646.
- [10] H. Kwon, A. Park, S. Lee, H. Cho, H. Jung, C. Park, *J. Electrochem. Soc.*, 166 (2019) A2221-A2229.
- [11] N. Lin, J. Zhou, J. Zhou, Y. Han, Y. Zhu, Y. Qian, *J. Mater. Chem. A*, 3 (2015) 17544-17548.
